# Supplementary figures and images for: Terminal epidermal differentiation is regulated by the interaction of Fra-2/AP-1 with Ezh2 and ERK1/2
Source: PubMed Central journal article supplement — Genes Dev. 2015 Jan 15;29(2):144–56. doi: 10.1101/gad.249748.114 (PMC4298134; doi:10.1101/gad.249748.114), 2015-01-15

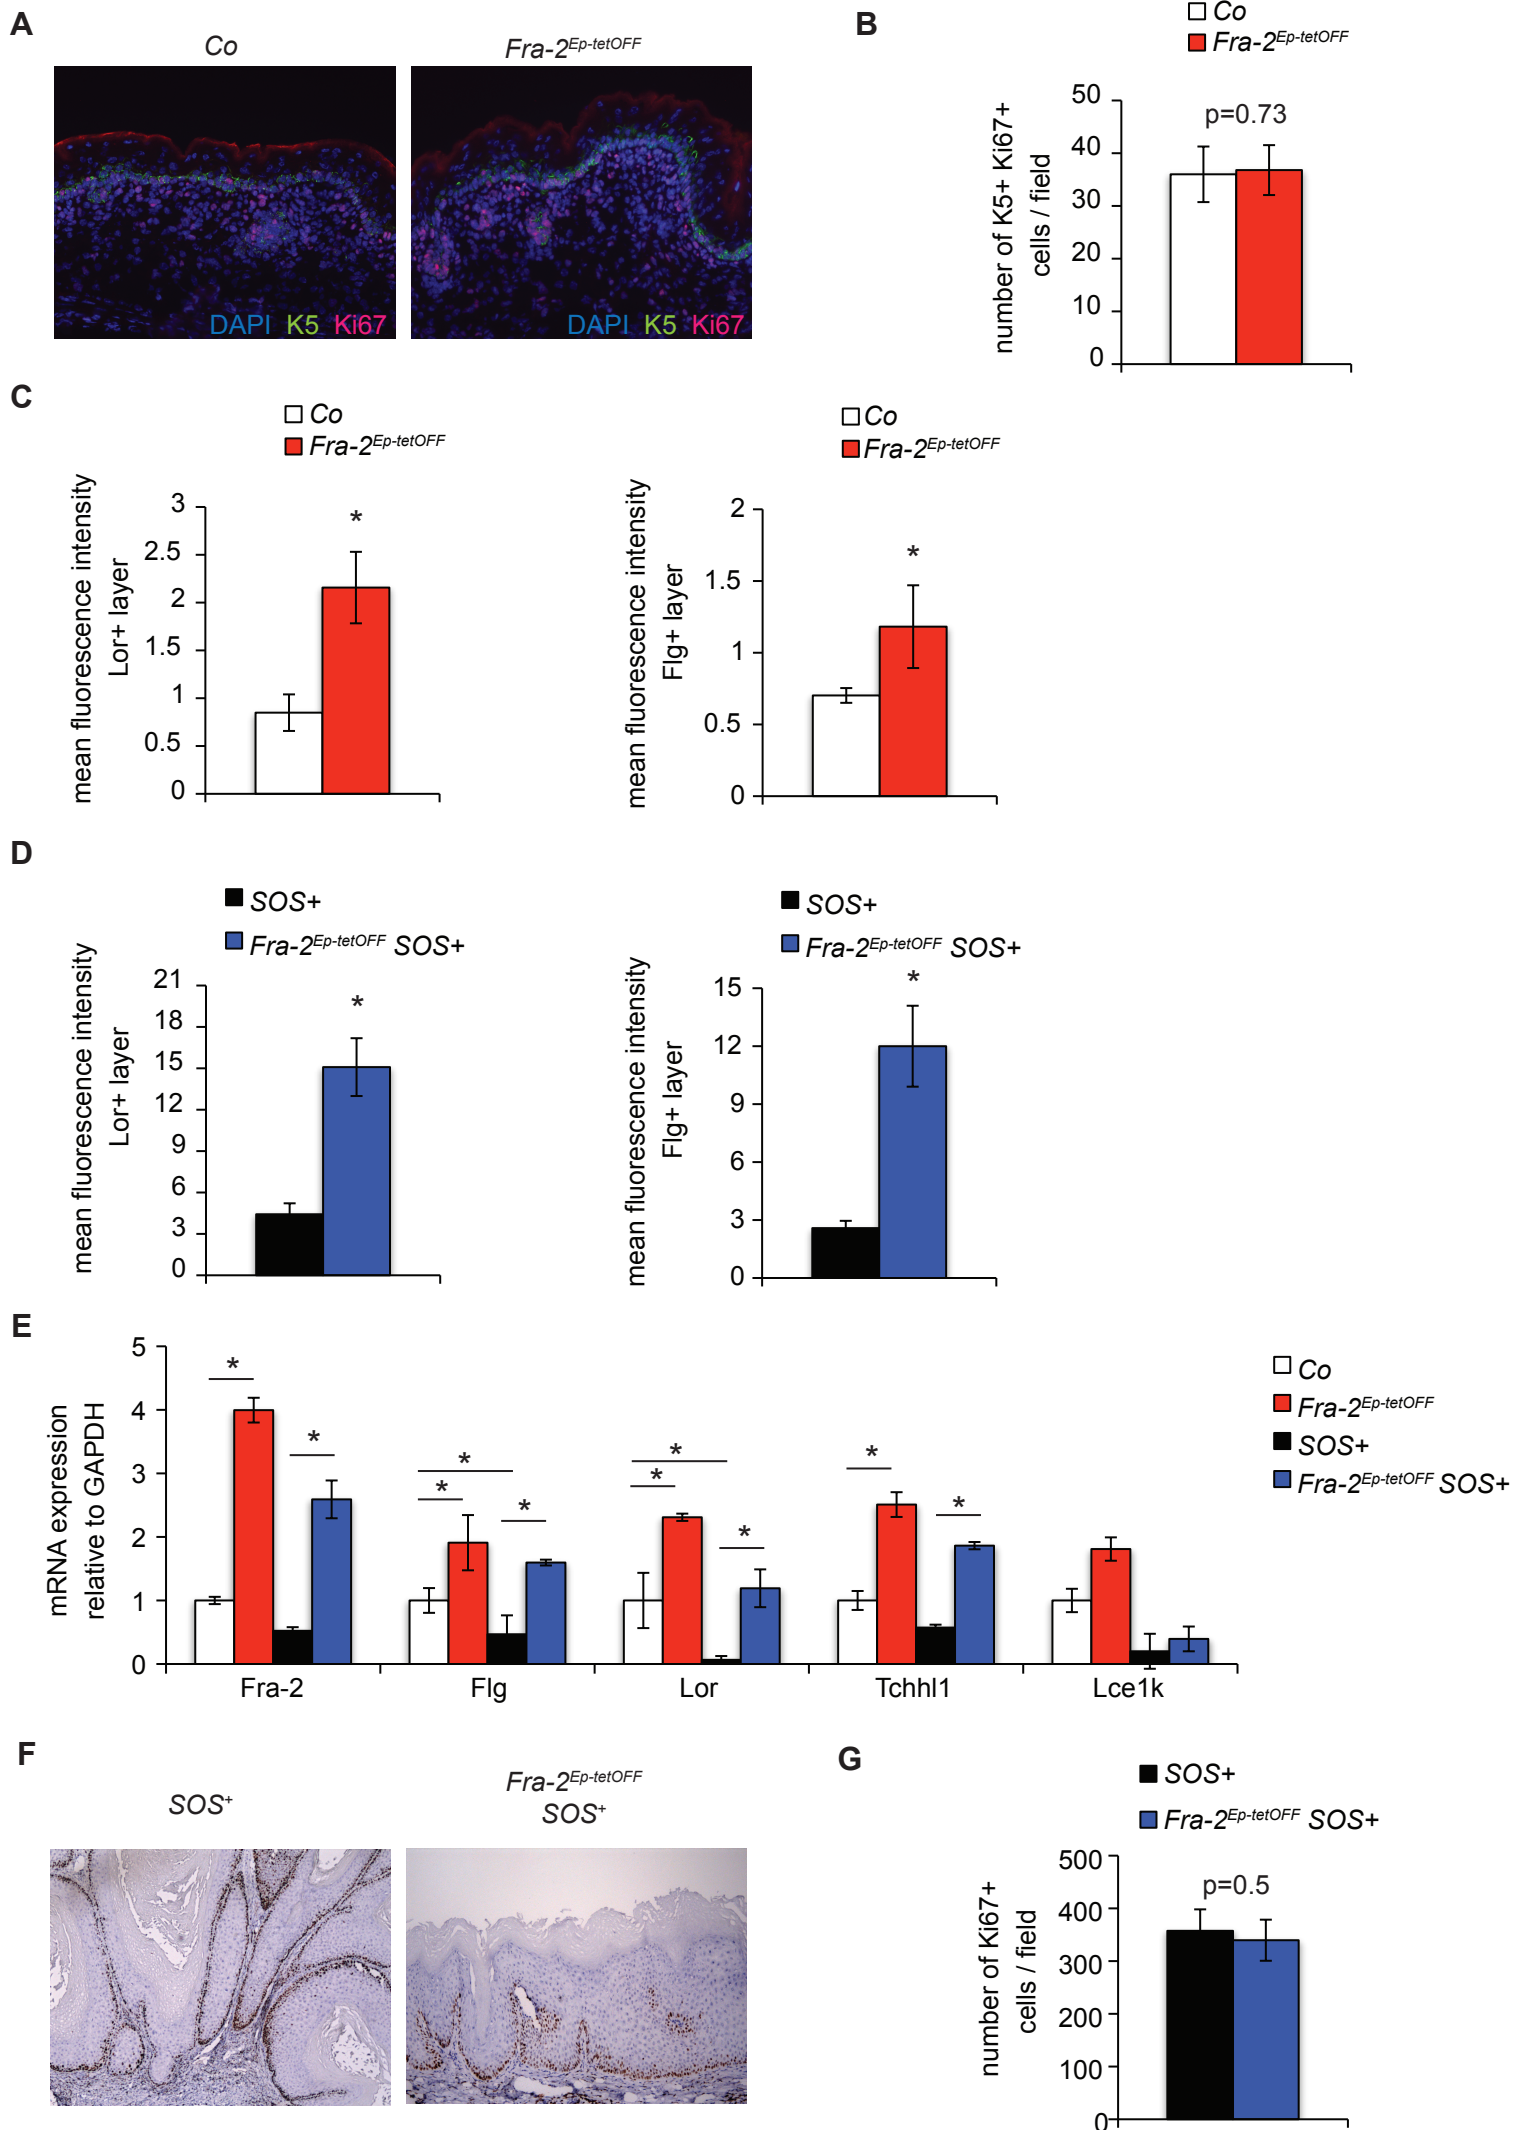

Supplement: supp_gad.249748.114_FigS1.pdf [file supp_gad.249748.114_FigS1.pdf]

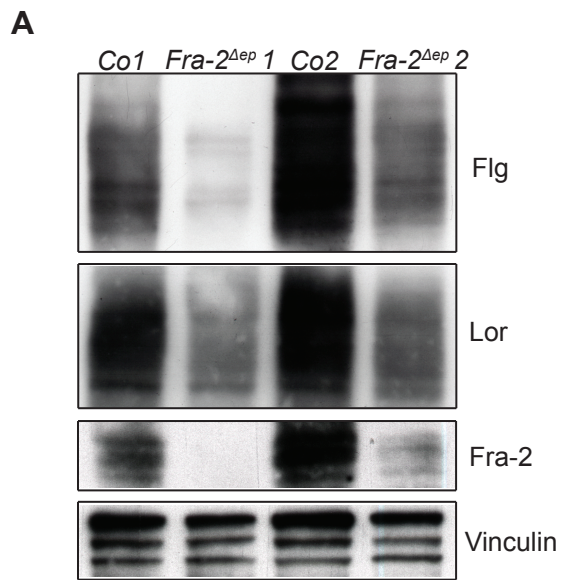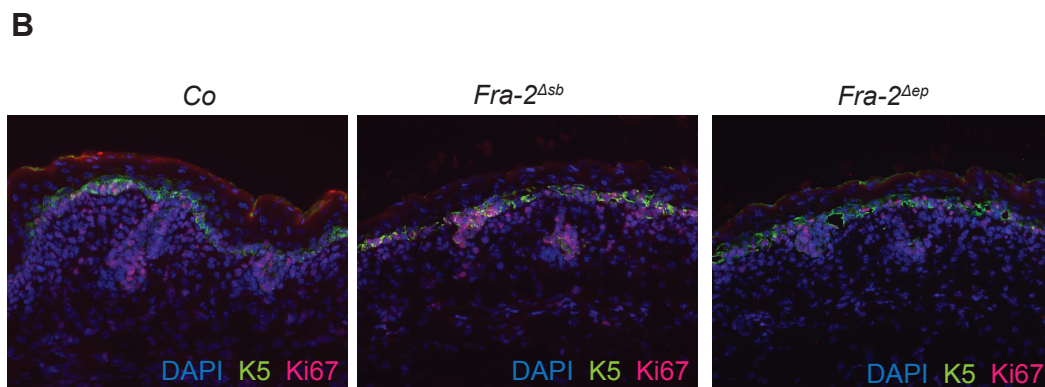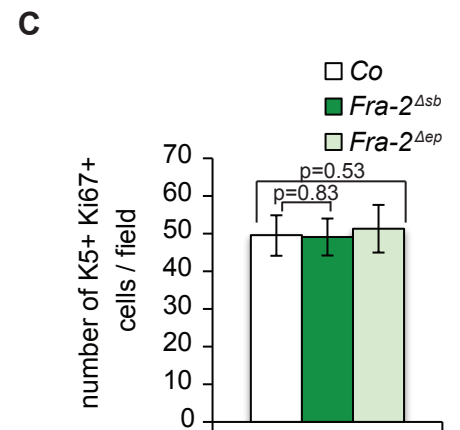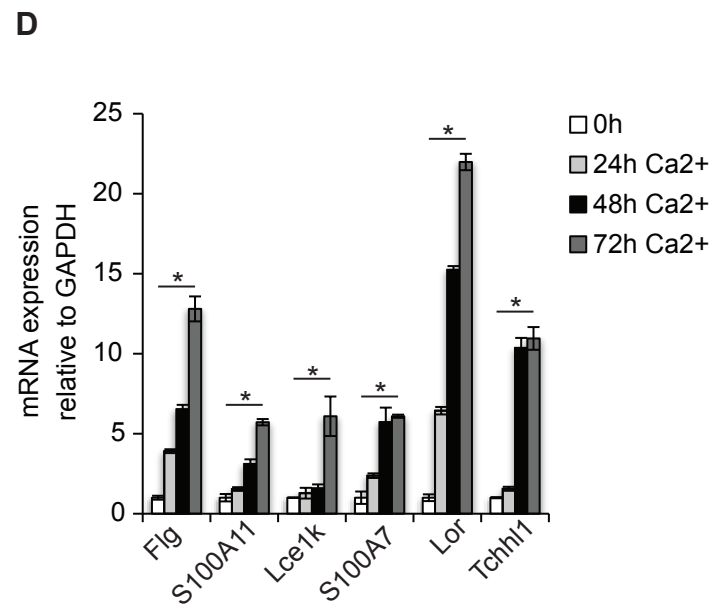

Supplement: supp_gad.249748.114_FigS2.pdf [file supp_gad.249748.114_FigS2.pdf]

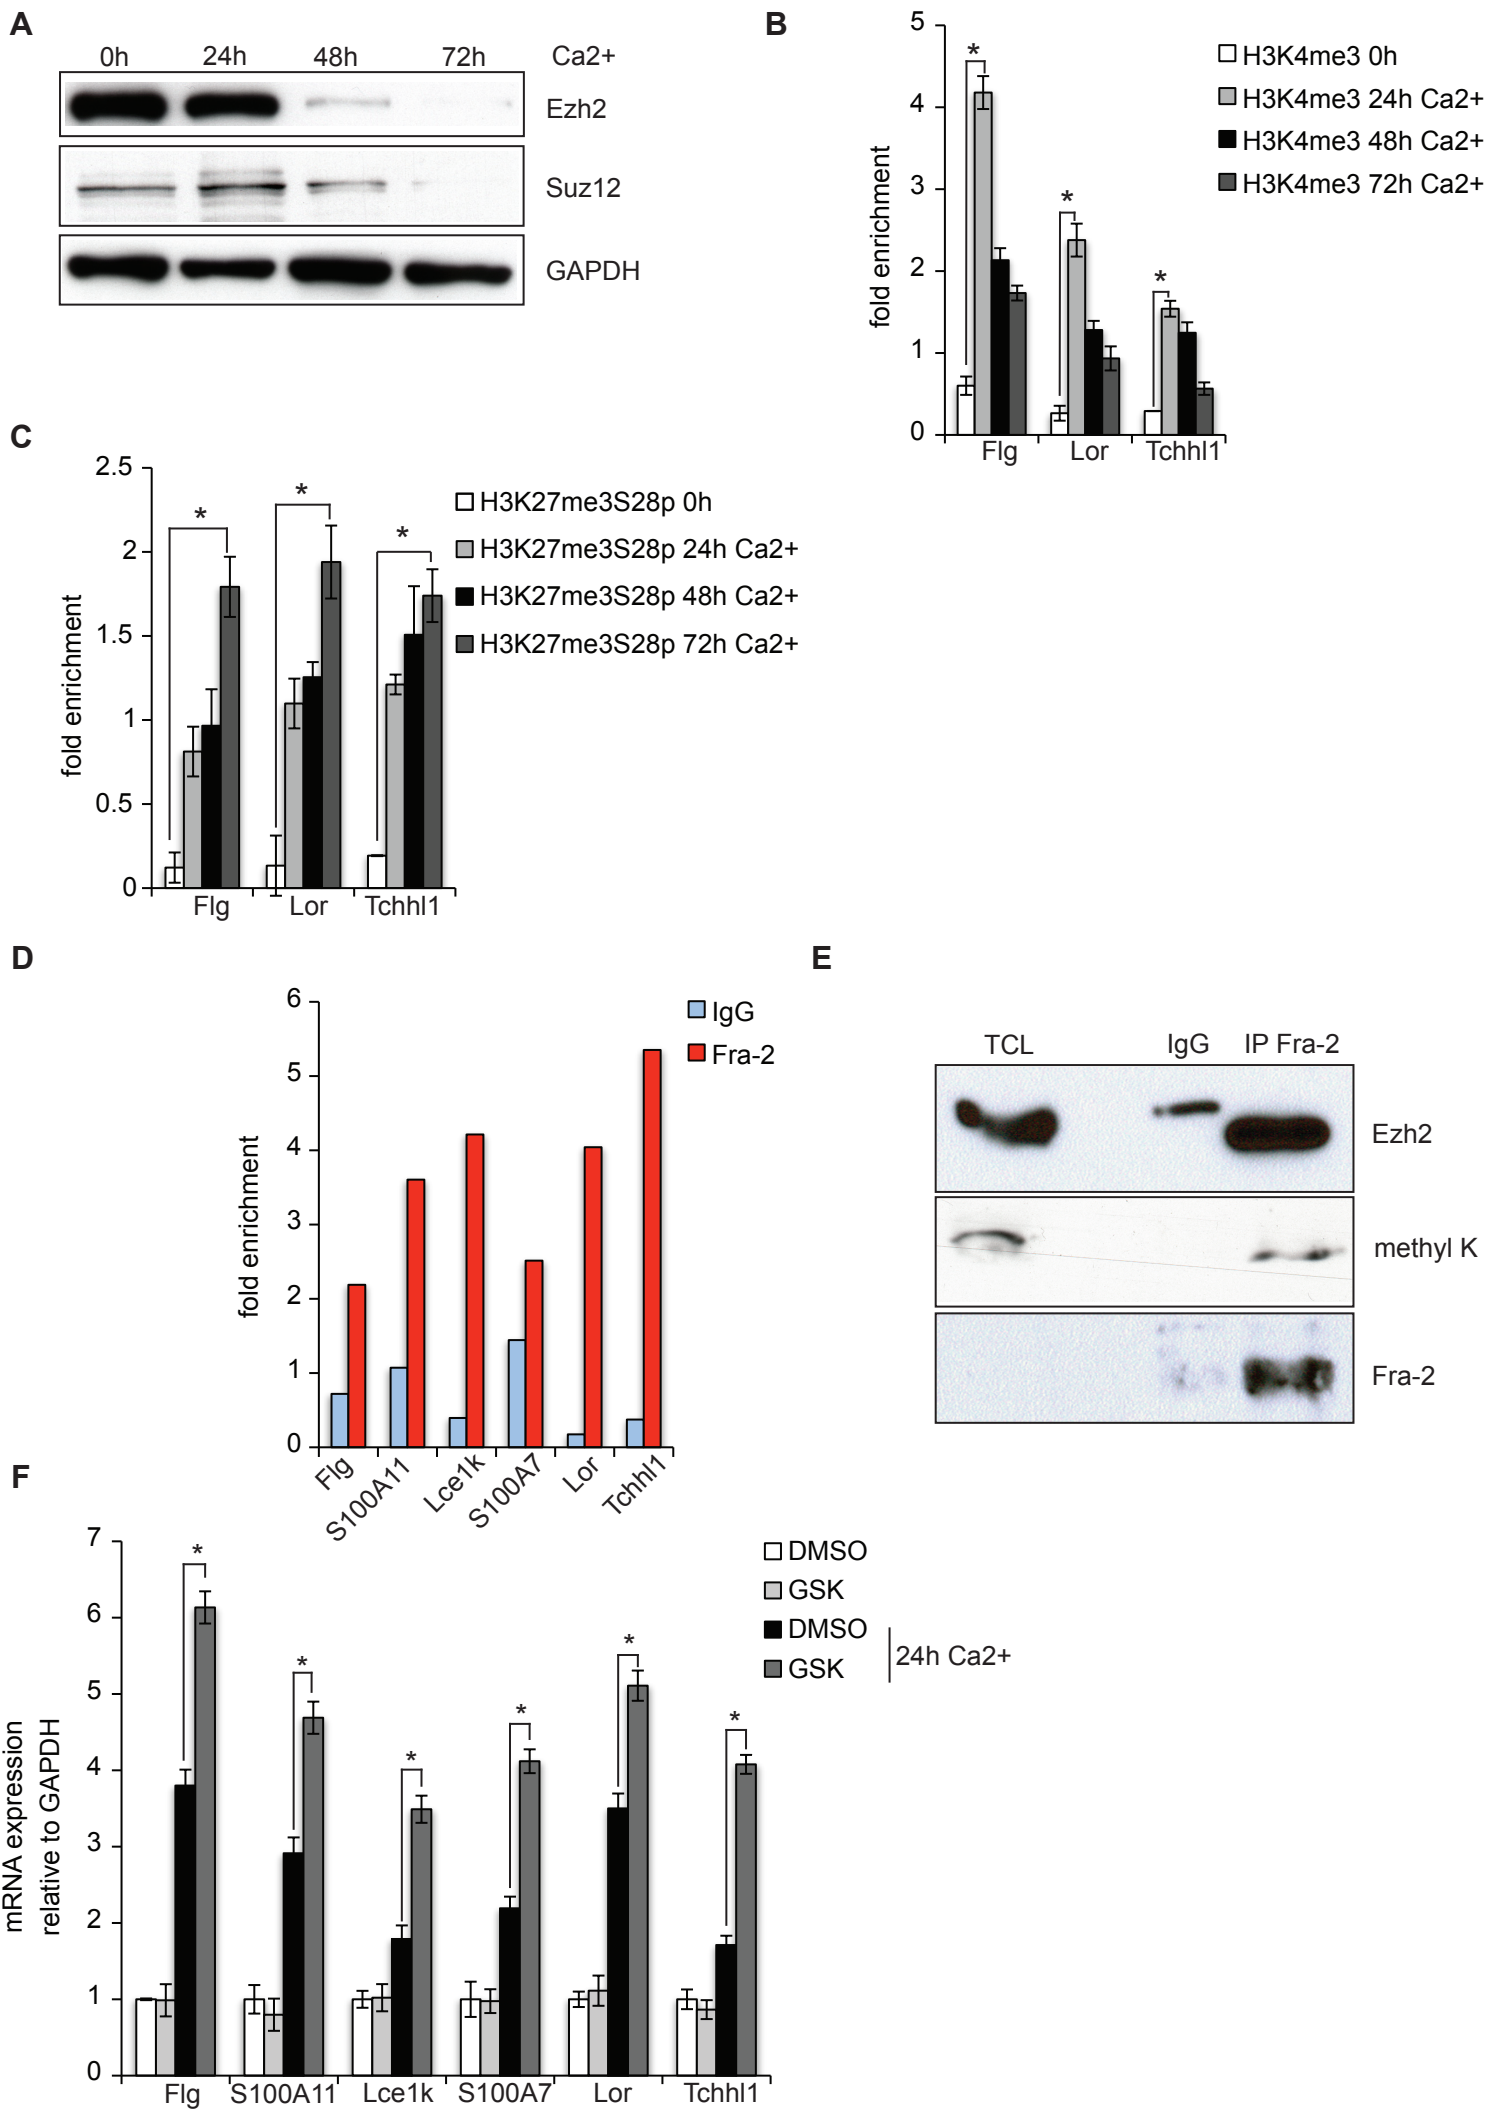

Supplement: supp_gad.249748.114_FigS3.pdf [file supp_gad.249748.114_FigS3.pdf]

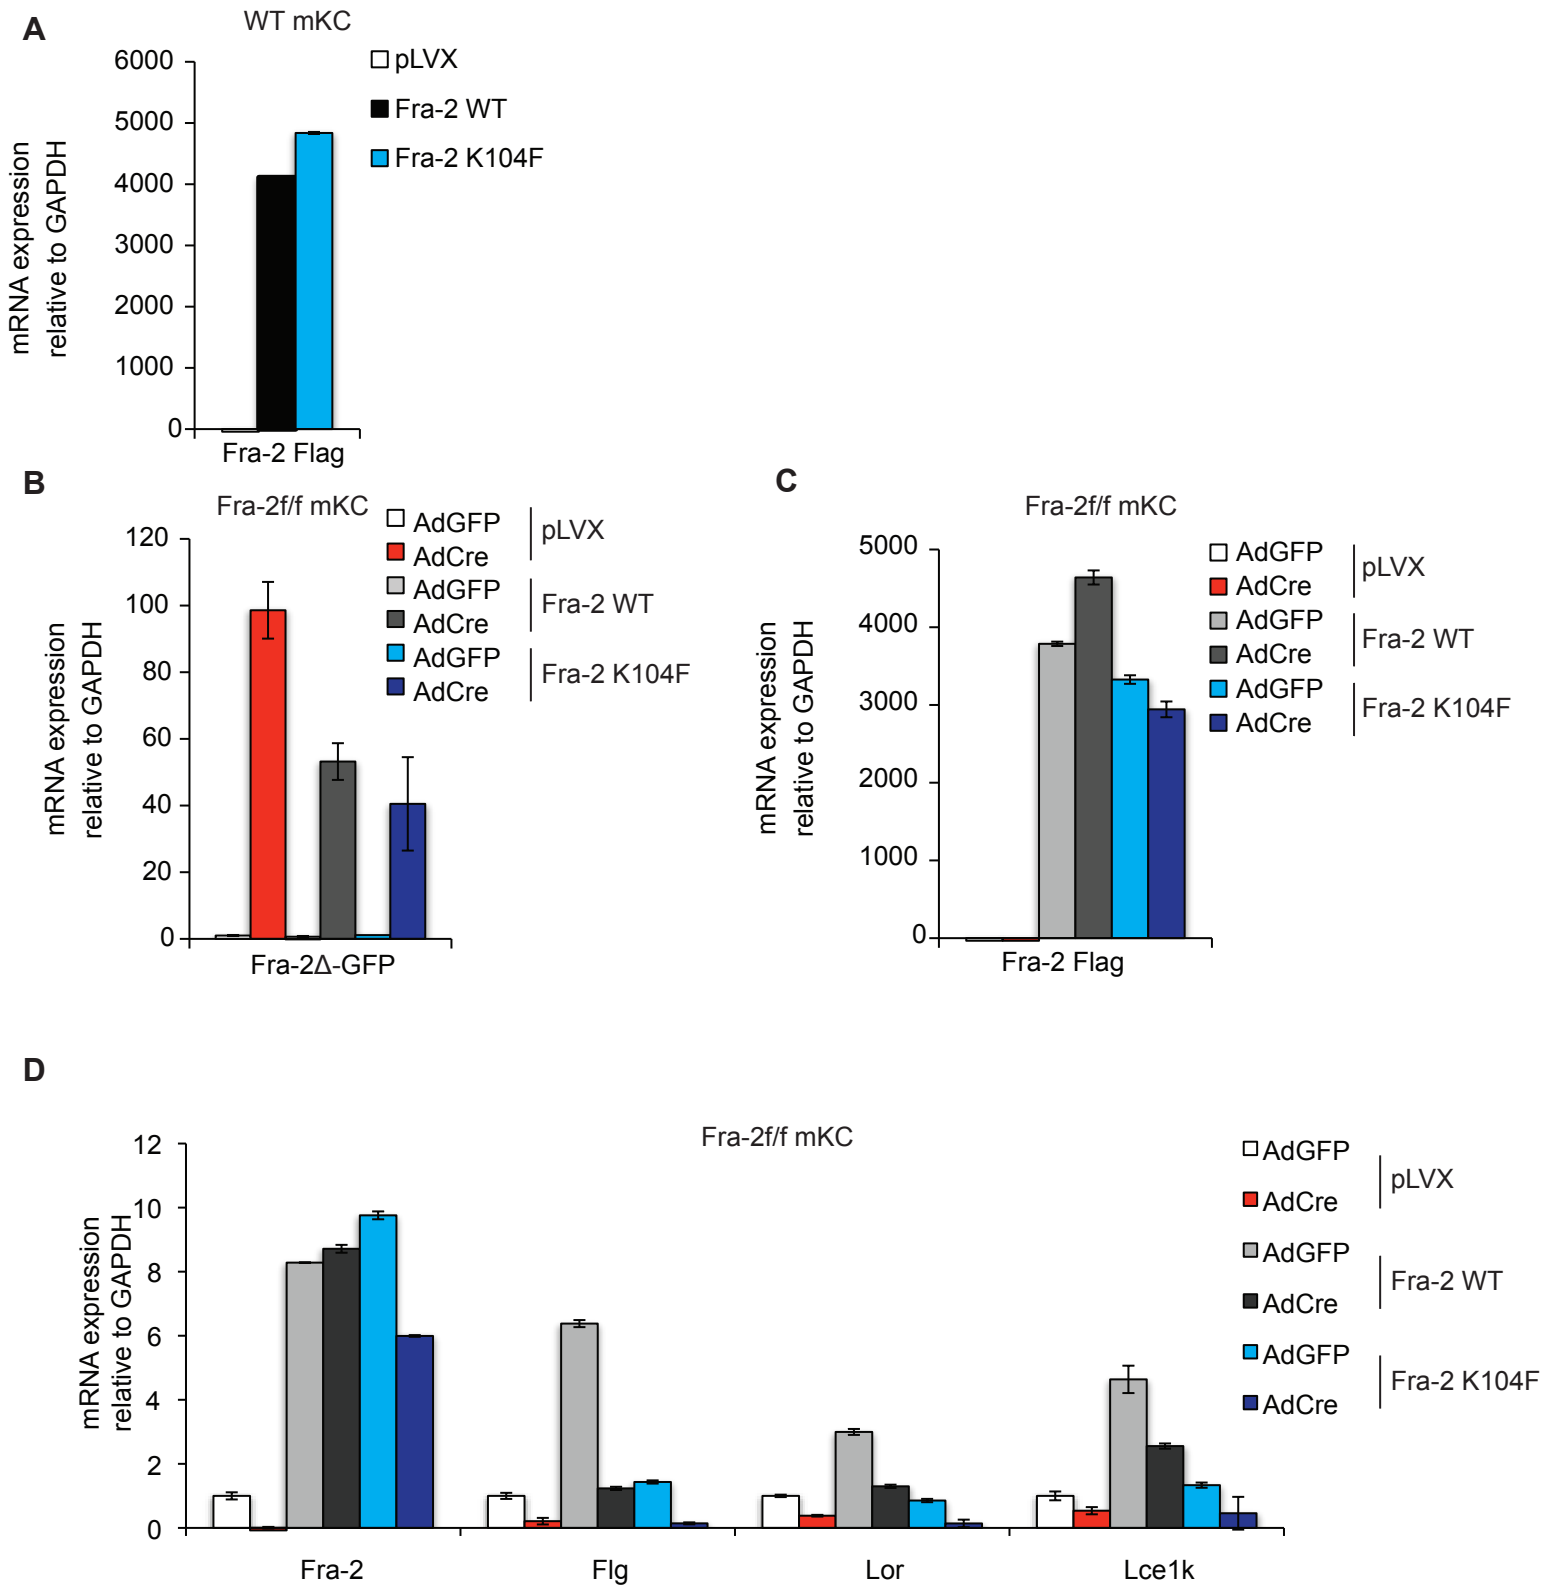

Supplement: supp_gad.249748.114_FigS4.pdf [file supp_gad.249748.114_FigS4.pdf]

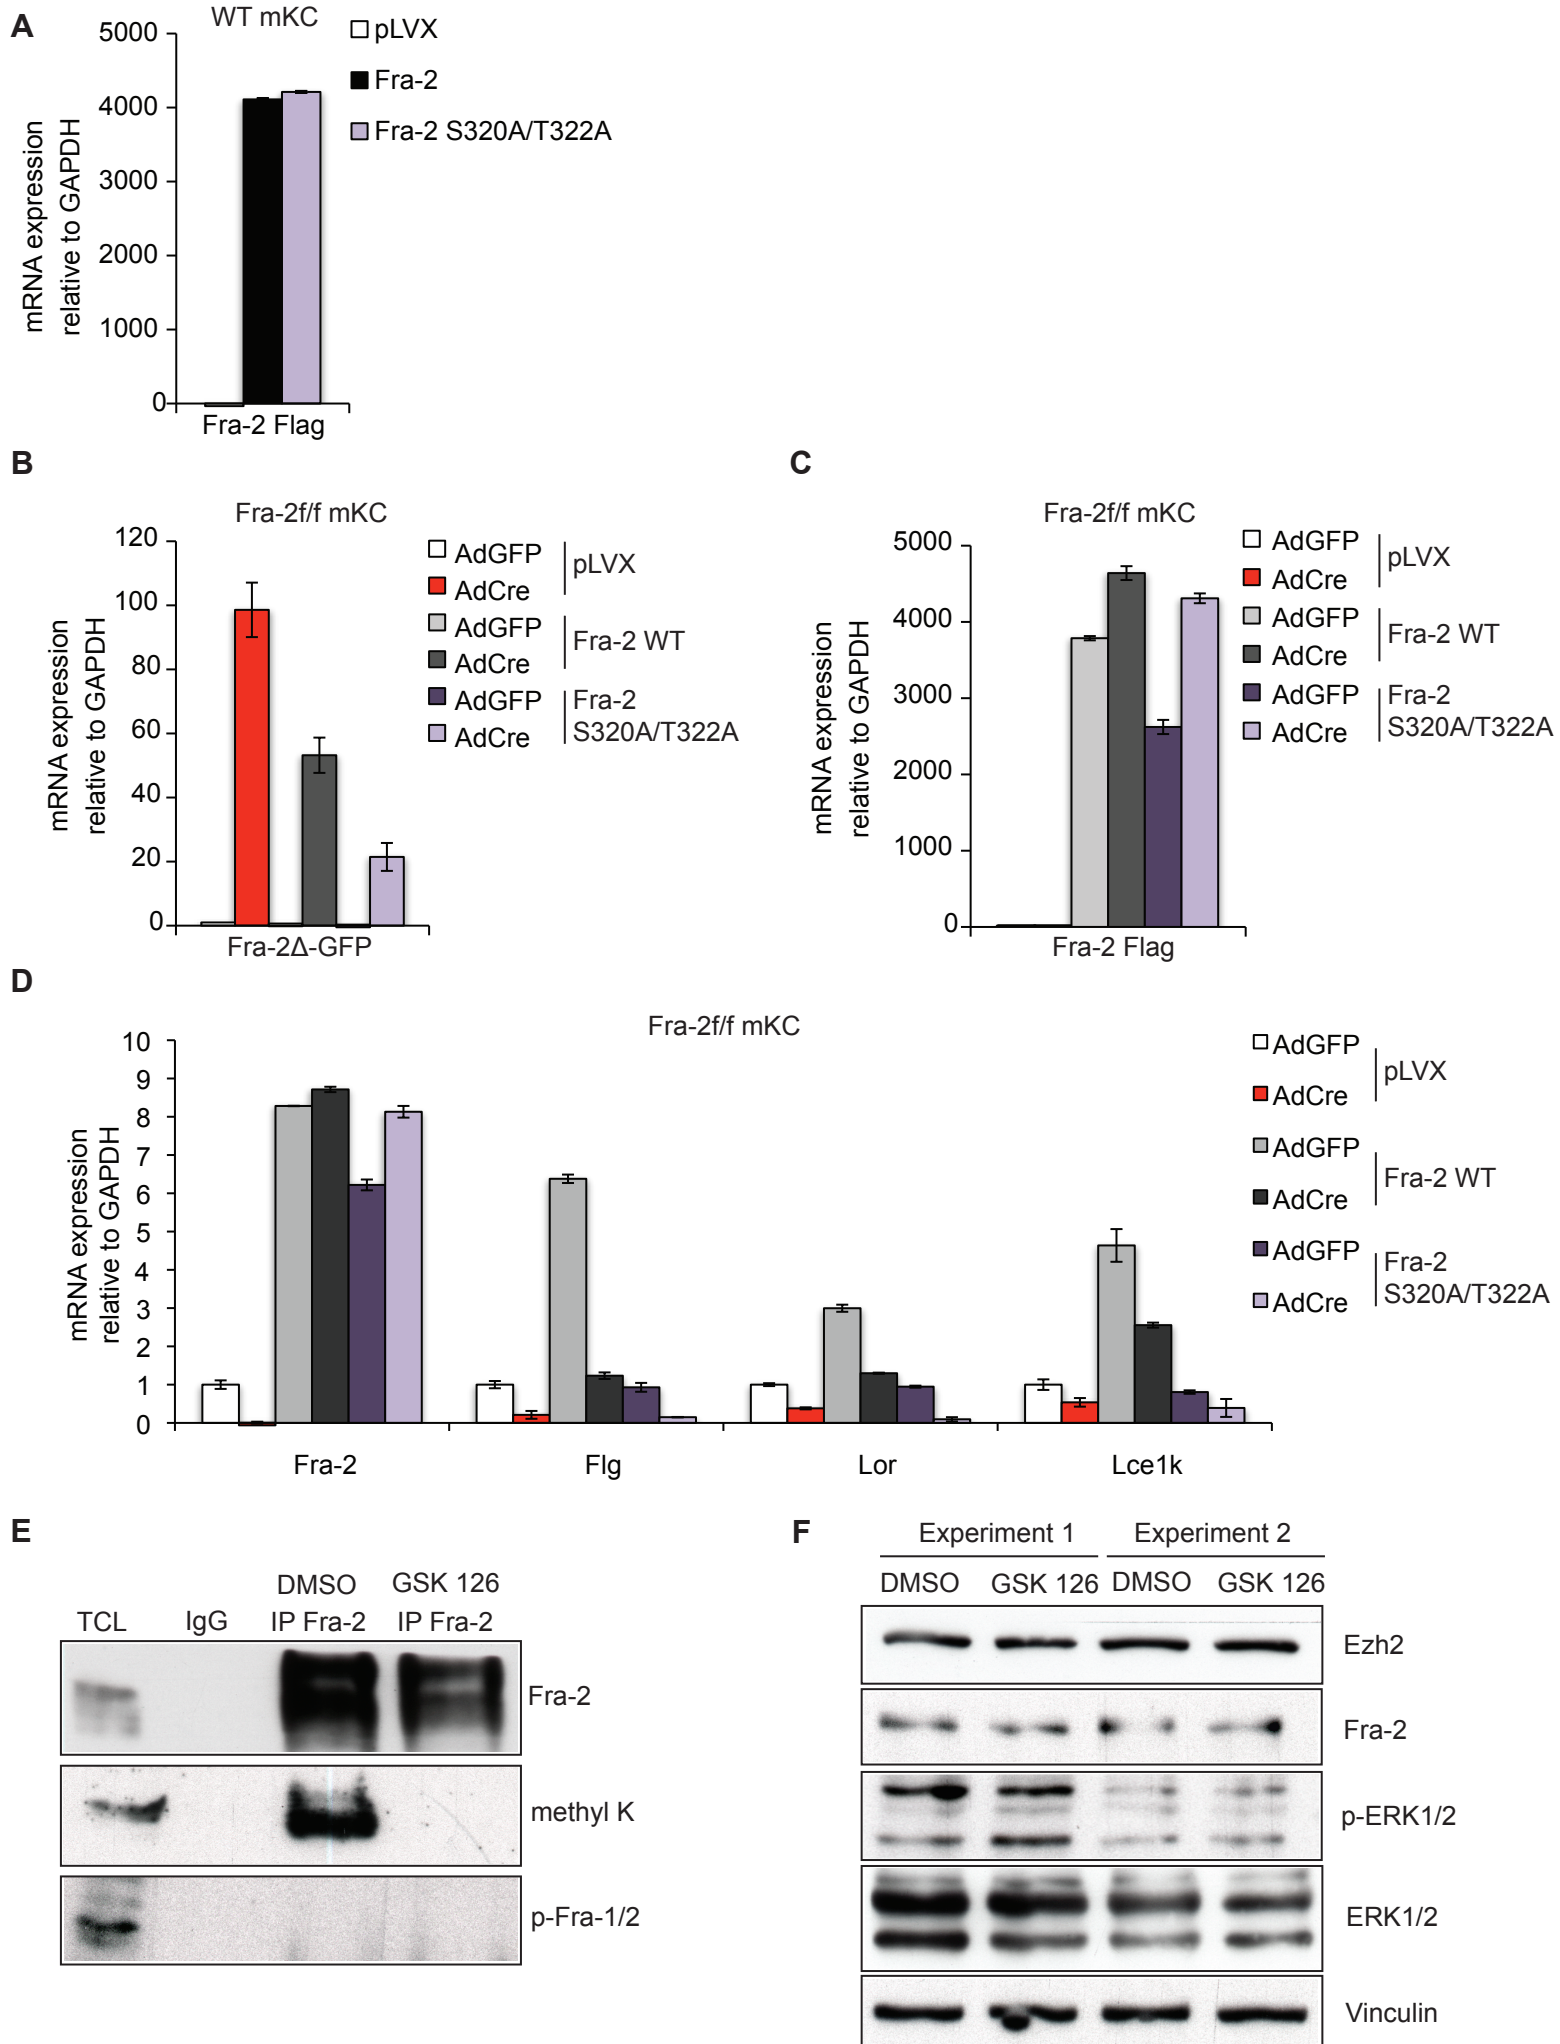

Supplement: supp_gad.249748.114_FigS5.pdf [file supp_gad.249748.114_FigS5.pdf]
